# Supplementary material
Source: Springer Nature journal article supplement (https://www.springermedizin.de/resource/supplementary/40345_2013_27_MOESM7_ESM.pdf/25658348)
Supplement: MOESM7 [file 25658348]

**Table 7 – Sub-set of participants who did not demonstrate change (quantitatively):**

| <b>Qualitative Finding</b>                                                                         | <b>Participant Quotes</b>                                                                                                                 |
|----------------------------------------------------------------------------------------------------|-------------------------------------------------------------------------------------------------------------------------------------------|
| Meaningful impact: a positive reminder and/or confirmation of their views and beliefs regarding BD | I think it did affirm the importance of being able to see things from the patient’s perspective and always keeping that in mind. 02-HP010 |

HP = healthcare provider.
